# Supplementary material for: Targeted Modification of Mammalian DNA by a Novel Type V Cas12a Endonuclease from Ruminococcus bromii
Source: MDPI journal article supplement (doi:10.3390/ijms23169289), 2022-08-18
Supplement: s1 [file s1]

## SUPPLEMENTARY MATERIALS

**Supplementary Table S1. Cas12a orthologs and their ability to edit the genomes of human cells**

| Cas12a orthologs                                        | Short title     | Scaffold nucleotide sequence, 5'-3' | Paper where was showed human cell gene editing, doi |
|---------------------------------------------------------|-----------------|-------------------------------------|-----------------------------------------------------|
| <i>Lachnospira eligens</i> ATCC 27750                   | EeCas12a        | UAAUUUCUACU UUUGUAGAU               | 10.1038/s41598-019-50423-6                          |
| <i>Moraxella bovoculi</i> 237                           | MbCas12a        | UAAUUUCUACU UUUUGUAGAU              | 10.1093/nar/gky815                                  |
| <i>Eubacterium rectale</i>                              | ErCas12a        | UAAUUUCUACU CUUGUAGAU               | 10.1089/crispr.2019.0026                            |
| <i>Acidaminococcus</i> sp                               | AsCas12a        | UAAUUUCUACU CUUGUAGAU               | 10.1093/nar/gky815                                  |
| <b><i>Ruminococcus bromii</i> sp.</b>                   | <b>RbCas12a</b> | UAAUUUCUACU AUUGUAGAU               | <b>current study</b>                                |
| <i>Butyrivibrio</i> sp. NC3005                          | BsCas12a        | UAAUUUCUACU AUUGUAGAU               | 10.1186/s13059-019-1620-8                           |
| <i>Lachnospiraceae bacterium</i> MA2020                 | Lb2Cas12a       | UAAUUUCUACU AUUGUAGAU               | 10.1096/tj.202001013RR                              |
| <i>Helcococcus kunzii</i> ATCC 51366                    | HkCas12a        | UAAUUUCUACU AUUGUAGAU               | 10.1186/s13059-019-1620-8                           |
| <i>Pseudobutyrvibrio xylanivorans</i> strain DSM 10317  | PxCas12a        | UAAUUUCUACU AUUGUAGAU               | 10.1186/s13059-019-1620-8                           |
| <i>Francisella novicida</i>                             | FnCas12a        | UAAUUUCUACU GUUGUAGAU               | 10.1093/nar/gky815                                  |
| <i>Thiomicrospira</i> sp. XS5                           | TsCas12a        | UAAUUUCUACU GUUGUAGAU               | 10.2302/kjm.2019-0009-OA                            |
| <i>Agathobacter rectalis</i> strain 2789STDY5834884     | ArCas12a        | UAAUUUCUACU GUUGUAGAU               | 10.1186/s13059-019-1620-8                           |
| <i>Butyrivibrio fibrisolvens</i> MD2001                 | BfCas12a        | UAAUUUCUACU GUUGUAGAU               | 10.1186/s13059-020-01989-2                          |
| <i>Lachnospiraceae bacterium</i> ND2006                 | LbCas12a        | UAAUUUCUACU AAGUGUAGAU              | 10.1093/nar/gky815                                  |
| <i>Moraxella bovoculi</i> AAX08_00205                   | Mb2Cas12a       | UAAUUUCUACU GUUUUGUAGAU             | 10.2302/kjm.2019-0009-OA                            |
| <i>Moraxella bovoculi</i> sp.                           | Mb3Cas12a       | UAAUUUCUACU GUUUUGUAGAU             | 10.1126/science.aau5174                             |
| <i>Coproccoccus eutactus</i> sp.                        | CeCas12a        | UAAUUUCUACU UCGGUAGAU               | 10.1186/s13059-020-01989-2                          |
| <i>Lachnospira pectinoschiza</i> strain 2789STDY5834886 | LpCas12a        | UAAUUUCUACU GUGUGUAGAU              | 10.1186/s13059-019-1620-8                           |
| <i>Pseudobutyrvibrio ruminis</i> CF1b                   | PrCas12a        | UAAUUUCUACU GUGUGUAGAU              | 10.1186/s13059-019-1620-8                           |

**Supplementary Table S2. Sequence of oligonucleotides used in the study** (T7 promoter complementary region of oligonucleotides is highlighted green, protospacer complementary region is highlighted red, scaffold is black)

| DNA oligonucleotides 5'→3' |                                         |
|----------------------------|-----------------------------------------|
| Fwd_test                   | GGATGCAACTGAATCCTGTAG                   |
| Rev_test                   | TACCGCATAAGCCGGAATAAG                   |
| Fwd_RbCpf_Nde              | TGAACATATGATGCAAGAGCGTAAAAAATATCGCATC   |
| Rev_RbCpf_Xho              | ATCTACTCGAGATTATTCGCCATATCATTCTCCTGAACA |
| Fwd_NLS_Nhe_Hind           | CTAGATGCCGAAGAAAAAGCGCAAGGTCA           |
| Rev_NLS_Nhe_Hind           | AGCTTGACCTTGCGCTTTTTCTTCGGCAT           |
| Fwd_NLS_Hind               | AGCTCCCGAAGAAAAAGCGCAAGGTCA             |
| Rev_NLS_Hind               | AGCTTGACCTTGCGCTTTTTCTTCGGG             |
| Fwd_dnmt1_spacer1          | TAGAAAGGAAGTCTTGGCTGGCCTTCC             |
| Rev_dnmt1_spacer1          | AAAAGGAAGGCCAGCCAAGACTTCCTT             |
| Fwd_dnmt1_spacer2          | TAGATCACGGGACTTCTGGCTGAGGTCA            |
| Rev_dnmt1_spacer2          | AAAATGACCTCAGCCAGAAGTCCCGTGA            |
| Fwd_dnmt1_spacer3          | TAGATCTGATGGTCCATGTCTGTTACTC            |
| Rev_dnmt1_spacer3          | AAAAGAGTAACAGACATGGACCATCAGA            |
| Fwd_vegfa_spacer           | TAGATCTAGGAATATTGAAGGGGGCAGG            |
| Rev_vegfa_spacer           | AAAACCTGCCCCCTTCAATATTCCTAGA            |
| Fwd_emx1_spacer            | TAGATTCCTCCGGTTCTGGAACACACC             |
| Rev_emx1_spacer            | AAAAGGTGTGGTTCCAGAACCGGAGGAA            |

|                   |                                                                                                                               |
|-------------------|-------------------------------------------------------------------------------------------------------------------------------|
| Fwd_dnmt1_del_ngs | GACAGACACACGGAGTGTCTAGCT                                                                                                      |
| Rev_dnmt1_del_ngs | AATTTGGCTCAGCAGGCACC                                                                                                          |
| Fwd_dnmt1_sp1_ngs | CAAGGGCAGCTCAGTGGTGACTT                                                                                                       |
| Rev_dnmt1_sp1_ngs | CTGAGTCACGTGAGTTGATCCCCAT                                                                                                     |
| Fwd_dnmt1_sp2_ngs | GACAGACACACGGAGTGTCTAGCT                                                                                                      |
| Rev_dnmt1_sp2_ngs | GAAGCTGTTGTGTGAGGTTGCTTATC                                                                                                    |
| Fwd_dnmt1_sp3_ngs | CAGAACTAGTCCTTAGCAGCT                                                                                                         |
| Rev_dnmt1_sp3_ngs | CTCTGGGGACCGTTTGAG                                                                                                            |
| Fwd_vegfa_ngs     | GGGTCACTCCAGGATTCC                                                                                                            |
| Rev_vegfa_ngs     | CCAAGGTTACAGCCTGAAA                                                                                                           |
| Fwd_emx1_ngs      | GCCTCCTGAGTTTCTCATCTG                                                                                                         |
| Rev_emx1_ngs      | CTAGTCATTGGAGGTGACATCG                                                                                                        |
| Fwd_SDM_T         | TTTGGAATTTGTGCCACTTCTG                                                                                                        |
| Fwd_SDM_A         | TTTGGAATTTAGTGCCACTTCTG                                                                                                       |
| Fwd_SDM_C         | TTTGGAATTTTCGTGCCACTTCTG                                                                                                      |
| Rev_SDM           | GGTTTACCTTGACCCCTATAG                                                                                                         |
| Fwd_PAM_library   | GTAAAACGACGGCCAGTCCGCGAGTACTGATCATNNNNNNNNN <b>CCC</b><br><b>CTCTATTGATCCCCACC</b> TCCAAATATCTCATCAACAACGTCATAGCT<br>GTTTCCTG |

|                 |                                                                                                                              |
|-----------------|------------------------------------------------------------------------------------------------------------------------------|
| Rev_PAM_library | CAGGAAACAGCTATGACGTTGTTGATGAGATATTTGGA <b>GGTGGGGA</b><br><b>TCAATAGAGGGG</b> NNNNNNNNATGATCAGTACTGCGGCACTGGCCG<br>TCGTTTTAC |
| Fwd_RbCpf_RT    | AGTGACGACTTGAAGGCTGA                                                                                                         |
| Rev_RbCpf_RT    | CGTCACATGGCAGCTTAGAC                                                                                                         |
| Fwd_T7_guide    | TAATACGACTCACTATAGG                                                                                                          |
| Rev_TCA_guide   | <b>CTAAGAAACCATTATTATCA</b> ATCTACAAGAGTAGAAATTAC <b>CCCTATA</b><br><b>GTGAGTCGTATTA</b>                                     |
| Rev_TCG_guide   | <b>GGGTTCGCGCACATTTCCC</b> ATCTACAAGAGTAGAAATTAC <b>CCCTATA</b><br><b>GTGAGTCGTATTA</b>                                      |
| Rev_TCC_guide   | <b>CGTCAGGTGGCACTTTTCGG</b> ATCTACAAGAGTAGAAATTAC <b>CCCTAT</b><br><b>AGTGAGTCGTATTA</b>                                     |
| Rev_TCT_guide   | <b>AAAGTGCCACCTGACGTCTA</b> ATCTACAAGAGTAGAAATTAC <b>CCCTAT</b><br><b>AGTGAGTCGTATTA</b>                                     |
| Rev_CTA_guide   | <b>TATTTAGAAAAATAAACAAA</b> ATCTACAAGAGTAGAAATTAC <b>CCCTATA</b><br><b>GTGAGTCGTATTA</b>                                     |
| Rev_CTG_guide   | <b>AATAATGGTTTCTTAGACGT</b> ATCTACAAGAGTAGAAATTAC <b>CCCTATA</b><br><b>GTGAGTCGTATTA</b>                                     |
| Rev_CTC_guide   | <b>CCGTCATCACCGAAACGCGC</b> ATCTACAAGAGTAGAAATTAC <b>CCCTAT</b><br><b>AGTGAGTCGTATTA</b>                                     |
| Rev_CTT_guide   | <b>AAAAGTGCCACCTGACGTCT</b> ATCTACAAGAGTAGAAATTAC <b>CCCTAT</b><br><b>AGTGAGTCGTATTA</b>                                     |
| Rev_CCA_guide   | <b>ACATTTCCCCGAAAAGTGCC</b> ATCTACAAGAGTAGAAATTAC <b>CCCTAT</b><br><b>AGTGAGTCGTATTA</b>                                     |
| Rev_CCG_guide   | <b>AGACGTCAGGTGGCACTTTT</b> ATCTACAAGAGTAGAAATTAC <b>CCCTATA</b><br><b>GTGAGTCGTATTA</b>                                     |
| Rev_CCC_guide   | <b>GACGTCAGGTGGCACTTTTC</b> ATCTACAAGAGTAGAAATTAC <b>CCCTAT</b><br><b>AGTGAGTCGTATTA</b>                                     |
| Rev_CCT_guide   | <b>ATAATGGTTTCTTAGACGTC</b> ATCTACAAGAGTAGAAATTAC <b>CCCTATA</b><br><b>GTGAGTCGTATTA</b>                                     |
| Rev_TTC_guide   | <b>GTCAGGTGGCACTTTTCGGG</b> ATCTACAAGAGTAGAAATTAC <b>CCCTAT</b><br><b>AGTGAGTCGTATTA</b>                                     |
| crRNA_site1     | rUrArArUrUrUrCrUrArCrUrArUrUrGrUrArGrArUr <b>rCrCrCrCrUrCrUrArUr</b><br><b>UrGrArUrCrCrCrCrArCrC</b>                         |
| Fwd_gDNA_site1  | TCTTGCACTCATGAGCTGTC                                                                                                         |
| Rev_gDNA_site1  | GTTGAGGGTTATGAGAGTAGC                                                                                                        |

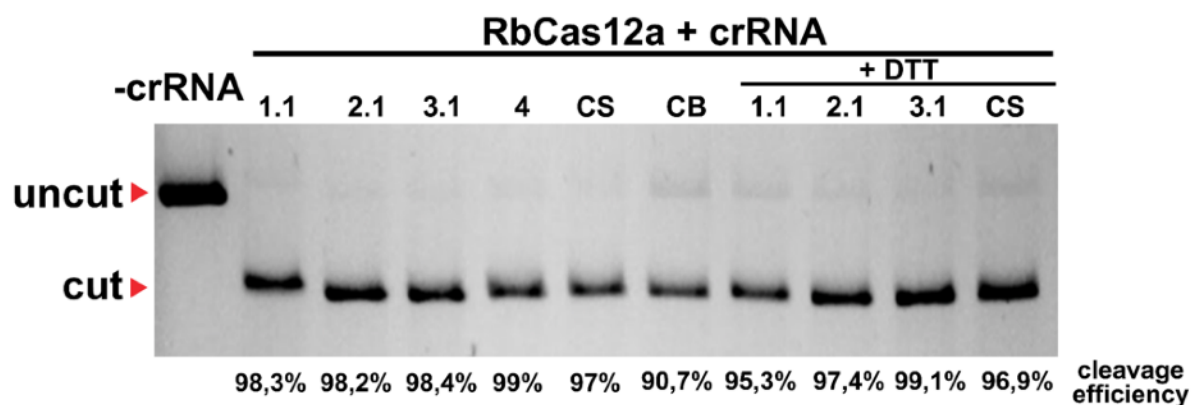

**Figure S1. Effect of buffers on RbCas12a crRNA cleavage activity.** Target DNA cleavage by RbCas12a programmed with 500 nM crRNA at a 1:3:30 target:RbCas12a:RNA ratio in various conditions. The effect of NEBuffer 1.1 (1.1), NEBuffer 2.1 (2.1), NEBuffer 3.1 (3.1), NEBuffer 4 (4), CutSmart (CS) and cleavage buffer (CB) either supplemented or not with DTT were tested. Mean cleavage efficiencies from three independent experiments are shown below the gel.

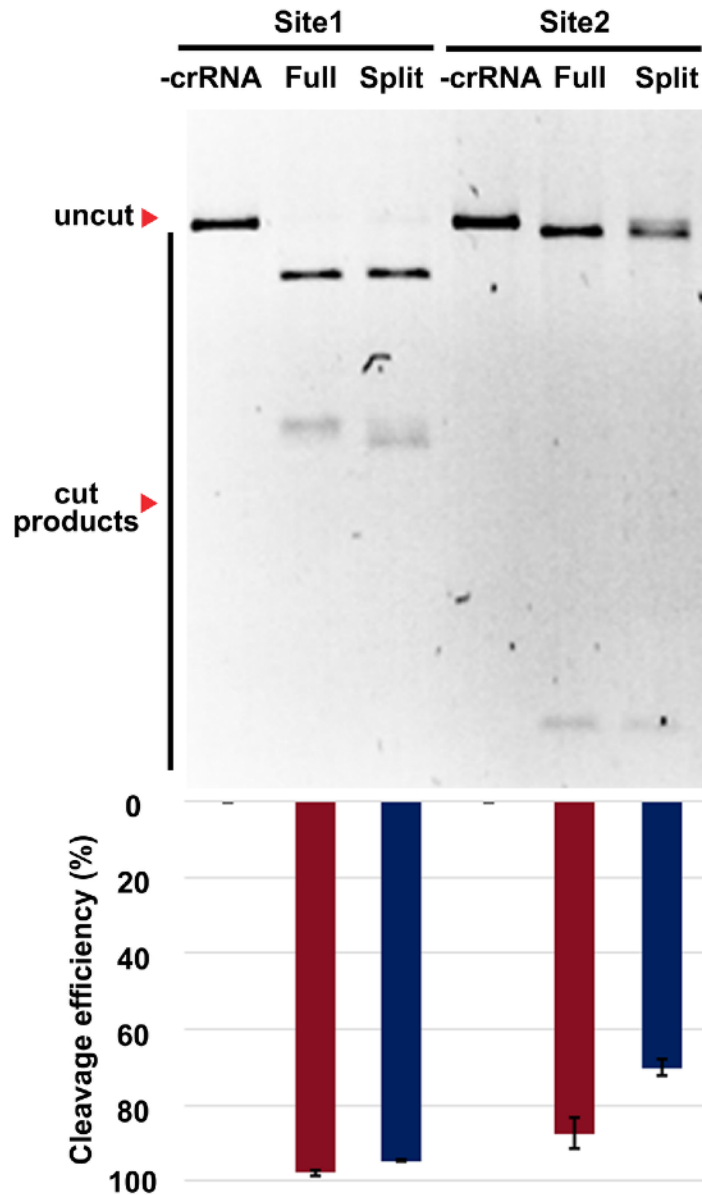

**Figure S2. Split crRNA activity is not dependent on the sequence of the crRNA spacer moiety.** Target DNA *in vitro* cleavage by RbCas12a loaded with full-sized or split crRNAs (500 nM) bearing different guide sequences ('Site1' and 'Site2' as indicated above the panel). The cleavage efficiencies calculated from one experiment are shown on the bottom. Mean cleavage efficiencies and standard deviations calculated from three independent experiments are shown.

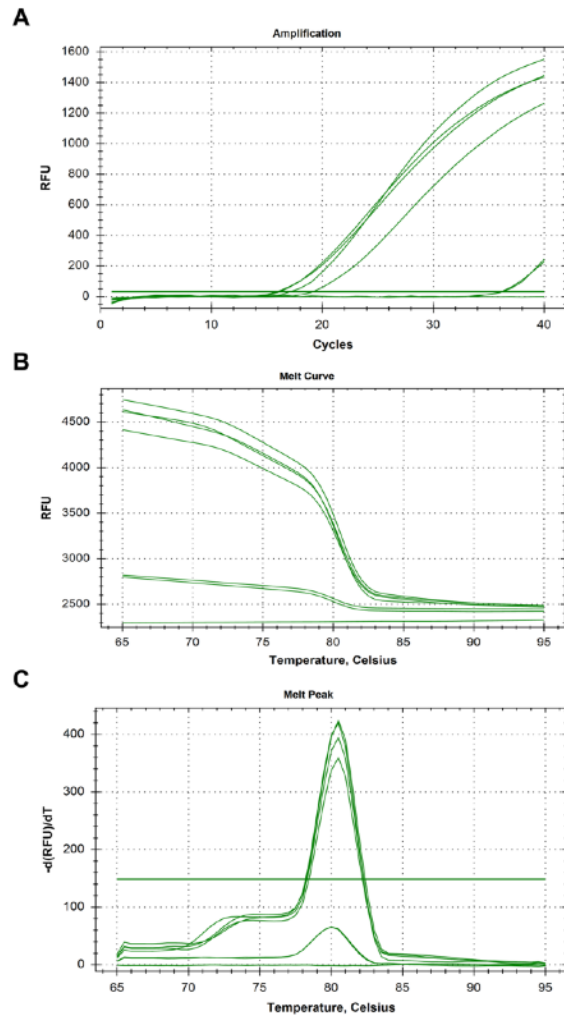

**Figure S3.** Real-time RT-PCR of RbCas12a mRNA extracted from HEK293T in 24 and 48 hours after transfection (500 ng and 2500 ng of hRbCas12a plasmid vector). **(A)** The signal grows exponentially from cycle 15 in four samples with hRbCas12a plasmid vector. In two mock samples where the plasmid vector was not added the signal is observed from cycle 35. **(B), (C)** Melt curves and peaks indicate specificity of the primer pair.

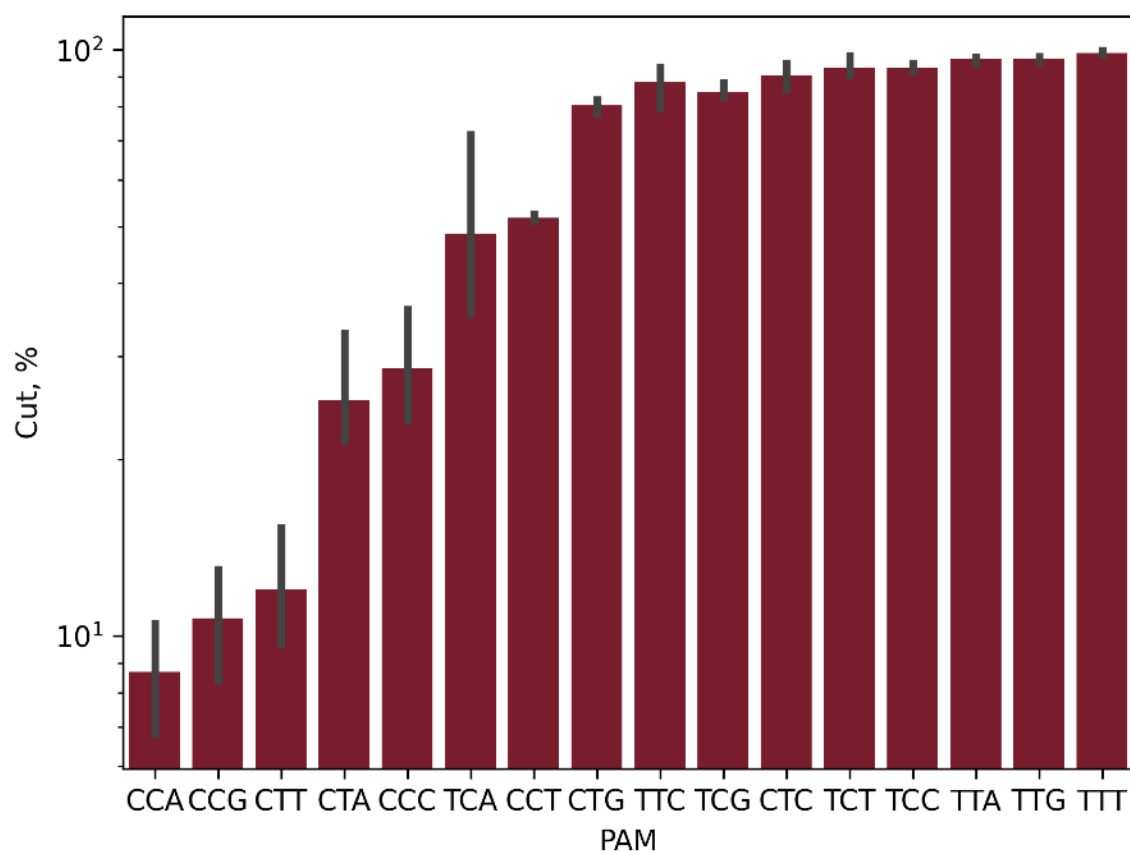

**Figure S4.** Investigation of RbCas12a 5'-YYN PAM sequence by *in vitro* cleavage assay. Bar plots display the LFC depletion of PAM containing DNA sequences following treatment with RbCas12a.



## Nucleotide sequence of RbCas12a

ATGCAAGAGCGTAAAAAATATCGCATCTTACACACAGAAATTCAGTTAAAAAACAATTAGGATGCAACTGAATCCTGTAGGT  
AAAAAATGGATTATTTTCAAGCAAAGCAAATTCCTGAAAATGATGAAAAGCTTAAAGAGAACTATCAGAAAATCAAGGAAAT  
AGCAGACAGGTTTTACAGAAATTTAAATGAGGATGTACTTTCAAAAACCGGGTTAGATAAATTTAAAGATTATGCTGAAATTTA  
CTATCACTGTAATACGGATGCAGACCGAAAAAGACTTTGATGAATGTGCATCGGAATTAAGGAAAGAAATCGTCAAAAATTTTA  
AGAATAGAGATGAGTATAACAACTATTCGATAAAAAGGATGATTGAGATAGTTCTTCCCCAGCATCTTAAAAACGAGGACGAAA  
AGGAAGTTGTAGCCTCATTTAAAAATTCACAACATACTTTACAGGTTTCTTCACTAACAGAAAAAATATGTATTCGGACGGAG  
AAGAATCCACGGCAATCGCATATAGATGCATTAACGAAAATTTGCCTAAACATCTTGACAATGTCAAGGCCTTTGAAAAAGCAA  
TTTCTAAACTATCCAAAAACGCAATTGATGATTTAGATGCCACTTATTCGGCTTATGCGGTACAAATTTGTATGATGTTTTTACA  
GTTGATTATTTTAACTTTTGTCTCCACAATCCGGAATTACCGAATATAACAAAATCATCGGCGGTTACACAACAAGCGACGGTA  
CAAAAGTTAAGGGTATTAACGAATATATAAATTTGTACAATCAACAAGTATCCAAACGGGATAAAATTCCTAATCTTCAAATTTT  
GTATAACAAATTTTAAGTGAGAGTGAAAAGGTATCATTCATACCGCCAAAGTTTGAAGATGACAACGAACTTTTATCGGCTGT  
TTCAGAGTTTACGCAACGACGAAACCTTTGACGGGATGCCATTAAGCAATTTGATGAAACAAAGCTATTATTCGGCA  
ATTAGATAATTCCTCTCTTAATGGAATTTACATTCAAAAATGACCGATCCGTGACAAATCTGTCAAACAGTATGTTCCGGTCTTGG  
TCGGTAATAGAAGATTATGGAACAAAAATTATGACTCCGTTAATTCAAACAGCAGAATCAAAGATATTCAAAAAGCGTGAAGAC  
AAAAGAAAAAAGCATACAAAGCAGAAAAGAACTTTCACTTTCAATTTTACAGGTTTTGATTTCCAATTCGGAAAAATGATGA  
AATCAGAAAAAAGTCTATCGTAGATTACTACAAGACTTCTTTAATGCAACTTACCAACAATTTATCAGACAAATACAACGAAGC  
AGCACCTCTGTTCAGTGAAAATTACGATAATGAAAAAGGTTTGAAGAAATGACGATAAATCTATTTTCAATTAATAAATTTTCTT  
GATGCCATAAAAGAAATTTGAAAAATTCATAAAGCCTTTGTCCGAACTAATATTACAGGTGAGAAAAATGATTTGTTTTACAGT  
CAGTTCACACCATTACTTGATAATATCAGCAGAATAGACATATTATATGATAAGGTCAGAACTATGTTACACAAAAACCGTTTTT  
CAACCGATAAAATCAAGCTTAACCTTTGACAATTACCAGCTATTAAACGGCTGGGATAAAGACAAAGAAAGAGAGTACGGAGCC  
GTTTTGCTTTGTAAAGATGAAAAGTATTATCTTGCAATCATAGATAAAGCAATAATCGTATTTGGAAAAATTTGATTTTCAAGA  
CTGCGATGAAAGCGATTGTTACGAAAAGATAATTTACAAGCTTCTCCCCACTCCAAATAAAATGCTTCCAAAAAGTTTTCTTTGC  
AAAAAAGCACAAAAAATTTTGTACCGTCAGACGAAATACTTAAATTTATAAAGCGGCCTTTCAAAAAAGGTGATAAGT  
TCAGCCTTGATGATTGCCATAAGTTAATTGATTTCTACAAAGAATCATTCAAAAAAGTACCCAAAATGGTTAATTTATAACTTTAAA  
TTCAAAAAAACAAACGAATATAACGATATCCGCGAATTTTATAATGATGTTGCTTTACAGGGATATAATTTTCAAAAAATGAAAA  
TCCCGACATCATTTATTGACAACTTGTAGATGAAGGAAAAATCTATCTTTTCCAATCTACAACAAAGACTTTTACCAGCATAG  
CAAGGGTACTCCTAATCTGCATACACTTTATTTTAAATGTTATTTGATGAAAGAAATCTTGAAGATGTGGTGTATAGGCTTAAC  
GGTGAGGCAGAAATGTTTTATCGTCTGCAAGTATAAAATATGACAAACCCACTCATCCAAAAAACACACCGATAAAAAAATAA  
AAATACACTCAATGATAAAAAAGCAAGCACTTTTCTTATGACTTAATTAAGATAAACGCTACACTAAATGGCAGTTTTCACTT  
CACTTCCCTATTACCATGAATTTTAAAGCTCCGGATAGGGCAATGATCAATGATGATGTCAGAAATCTGCTGAAATCCTGCAACA  
ACAATTTTCATCATAGGAATTGACAGAGGCGAAAAGAACTTGCTTTATGTCAGCGTAATTGACAGCAACGGTGCTATAATATATC  
AGCACTCACTCAATATTATCGGAAACAAGTTTAAAGGAAAAACATACGAACTAACTACCAGGAAAAAATTTGCAACAAGAGA  
AAAAGAGCGTACGGAAACAGCGCCGTAAGTGGAAAGCAATTGAGAGTATAAAGAACTCAAAGAGGGGCTATATCAGTCAGGCT  
GTGCATGTTATATGTCAGCTTGTTGTCAAGTACGATGCAATCATCGTTATGGAAGGCTGACTGACGGATTCAAACGAGGCAGA  
ACAAAGTTTGAAAAACAGGTTTATCAGAAATTTGAAAAATGCTGATTGACAACTTAATTACTATGTTGACAAAAAGCTTGAT  
CCCGATGAAGAAGGCGGTTTACTTCATGCCTACCAGCTTACGAACAAGCTTGAGAGCTTTGATAAGCTTGGTACGCAAGCGG  
TTTTATTTTCTATGTTTCGTCTGATTTTACAAGCAAAATGATCCCGTTACCGGCTTTGTAAATTTGTTGTACCCTCGATATGAAA  
ACATTGACAAAGCCAAAGATATGATTTCAAGATTTGACGATATAAGATACAATGCCGGCGAGGACTTTTTTGAATTTGACATTGA  
TTACGATAAGTTTCCAAGACTGCGTCTGACTATCGCAAAAAGTGGACAATCTGTACTAACGGCGAAAGGATTGAAGCTTTCA  
GAAATCCCGCAACAATAACGAATGGAGTTATCGTACAATAATCTTGCAAGAAAAATCAAAGAATTATTTGATAACAATCTAT  
AAATTATCGTGATTCTGACGATTTGAAAGCTGAAATCTTTACAGACAAAGGGCAAATTTTTGAGGATTTCTTCAAATTTATTA  
AGACTTACCCTACAGATGCGAAACAGTAACCTGAAAACAGGCGAGGACCGTATTCTTCTCCCGTCAAGGACAAAAACGGCA  
ATTTTACGACAGTTCAAAATATGATGAAAAGAGCAAGCTTCCGTGTGACGCCGATGCAAACGGTGCGTACAACATTGCCCGC  
AAAGGTTTGTGGATTGTTGAACAATTCAAAAATCCGATAATGTTTCAACTGTGCAACCGGTAATTCACAATGACAAATGGCTG  
AAATTTGTTACAGGAGAATGATATGGCGAATAATCTCGAG

## Amino-acid sequence of RbCas12a

MQERKKISHLTHRNSVKKTIRMQLNPVGKTMDFYQAKQILENDEKLKENYQKIKEIADRFYRNLNEDVLSKTGLDKLKDYAEIYY  
HCNTDADRKRLDECASELRKEIVKNFKNRDEYNKLFDKRMIEIVLPQHLKNEDEKEVVASFKNFTTYFTGFFTNRKNMYS DGEEST  
AIAYRCINENLPKHLDNVKA FEKAISKLSKNAIDDL DATYSGLCGTNLYDVFTVDYFNFLLPQSGITEYNKIIGGYTTSDGTVKGIN  
EYINLYNQVSKRDKIPNLQILYKQILSESEKVSFIPPKFEDDNELLSAVSEFYANDETFDGMPLKKAIDETKLLFGNLDNSSLNGIYI  
QNDRSVTNLSNSMFGSWSVIEDLWNKNYDSVNSNSRIKDIQKREDKRKKAYKA EKKLSL SFLQVLISNSENDEIRKKSIVDYYKTS  
LMQLTNNLSDKYNEAAPL FSENYDNEKGLKNDDKSISLIKNFLDAIKEIEKFIKPLSETNITGEKNDFYSQFTPLLDNISRIDILYDKV  
RNYVTQKPFSTDKIKLNF DNYQLLNGWDKDKEREY GAVLLCKDEKY YLAIIDKSNNRILENIDFQDCDESDCYEKIYKLLPTPNK  
MLPKVFFAKKHKLLSPSDEILKIYKSGTFKKGDKFSLDDCHKLIDFYKESFKKYPKWLIYNFKFKKTNEYNDIREFYNDVALQGY  
NISKMKIPTSFIDKLVD EGIYLFQLYNKDFSPHSKGTPNLHTLYFKMLFDERNLEDVVYRLNGEAEMFYRPASIKYDKPTHPKNTPI  
KNKNTLNDKKASTFPYDLIKDKRYTKWQFSLHFPITMNFKAPDRAMINDDVRNLLKSCNNNFIIIGIDRGERNLLYVSVIDSNGAIY  
QHSLNIIGNKFKGKTYETNYQEKLATREKERTEQRRNWKAIESIKELKEGYISQAVHVICQLVVKYDAIIVMEKLTDGFKRGRTKFE  
KQVYQKFEKMLIDKLNY YVDKKLDPDEEGLLHAYQLTNKLESFDKLTGTS GFIFYVRPDT SKIDPVTG FVNLLYPRYENIDKAK  
DMISRFD DIRYNAGEDFF EFDIDYDKFPKTASDYRKKWTICTNGERIEAFRNPANNNEWSYRTIILAEKFKE LFDNNSIN YRDSDDLK  
AEILSQTKGKFFEDFFKLLRLTLQMRNSNPETGEDRILSPVKDKNGNFYDSSKYDEKSKLPCDADANGAYNIARKGLWIVEQFKKS  
DNVSTVEPVIHNDKWLKFVQENDMANNLE

## Human optimized nucleotide sequence of RbCas12a with nuclear localization signals

(SV40 NLS is highlighted red, nucleoplasmin NLS is blue)

ATGCCGAAGAAAAAGCGCAAGGTC AAGCTCCCGAAGAAAAAGCGCAAGGTC AAGCTCCCGAAGAAAAAGCGCAAGGTC AA  
GCTTATGCAAGAACGCAAGAAGATTAGTCATCTGACCCATAGAACTCCGTGAAGAAGACCATCCGTATGCAATTAAACCCGG  
TCGGCAAGACCATGGACTACTTCCAAGCCAAGCAAATCCTGGAGAACGACGAGAAGCTGAAGGAAAACTACCAAAAGATCA  
AGGAGATTGCCGACCGTTTCTATAGAACTTAAACGAAGACGTCCTGAGCAAGACTGGTTTGGACAAGTTAAAGGACTACGCT  
GAGATCTATTACCATTGTAACACGGACGCCGACCGTAAGAGACTGGACGAGTGTGCCAGTGAGTTACGTAAGGAGATCGTAAA  
GAACTTCAAGAACAGAGACGAATACAACAAGCTATTTGACAAGCGTATGATCGAAATTGTGTGCCGCAACATCTGAAGAACG  
AAGACGAGAAGGAGGTGGTCGCGTCTTCAAGAACTTACCACCTACTTCACCGGCTTTTTTACTAACAGAAAGAACATGTAC  
AGTGACGGAGAGGAGTCGACGGCCATCGCCTACAGATGTATCAACGAGAAGTTACCGAAGCATCTGGACAACGTAAAGGCAT  
TCGAGAAGGCTATCAGTAAGCTATCGAAGAACGCCATCGACGACTTAGACGCAACTTACTCGGGCTTATGTGGAACCAACTTG  
TACGACGTGTTACCGTGGACTACTTCAACTTCTTGCTGCCGCAATCGGGAATCACTGAGTACAACAAGATCATCGCGCGCTAC  
ACCACCTCTGACGGCACCAAGGTGAAAGGTATCAACGAGTACATTAACCTTGTAACAACCAACAAGTCTCGAAGCGTGACAAGA  
TCCCCAAGCTGCAAATCTGTACAAGCAAATCTTAAGTGAAAGTGAGAAGGTCAGCTTTATCCACCGAAGTTCGAGGACGAC  
AACGAGCTGTAAAGTGCTGTGAGCGAATTTACGCCAACGACGAGACTTTCGACGGTATGCCGTAAAGAAGGCCATCGACGA  
GACCAAGCTATTATTTGGCAACTTAGACAACCTCGAGTCTGAACGGAATCTACATCCAAAACGACCGTTCGGTTACCAACTTAAG  
CAACAGTATGTTTGGCAGTTGGAGTGTGATTGAGGACTTATGGAACAAGAAGTACGACTCGGTGAAGTCTAACTCTAGAATCA  
AGGACATCCAAAAGCGCGAGGACAAGAGAAAGAGGCTACAAGGCCGAGAAGAAGCTGAGCCTGAGCTTCTTACAAGTGT  
TGATCTCGAACTCGGAGAACGACGAGATCAGAAAGAAGAGTATCGTCGACTACTACAAGACTAGTTTAATGCAACTGACTAAC  
AACTTAAGCGACAAGTACAACGAGGCCGCCCGTTATTTAGTGAGAAGTACGACAACGAGAAGGGCTTGAAGAACGACGACA  
AGAGTATCAGCTTAATCAAGAAGTCTCTGGACGCAATTAAGGAGATCGAGAAGTTTATTAAGCCGTTGTGCGGAGACTAACATCA  
CCGGCGAAAAGAACGACTTGTTCTACAGTCAATTTACCCCGTTACTGGACAACATCTCTAGAATTGACATTTTATACGACAAGG  
TAAGAACTACGTGACCCAAAAGCCATTCAGCACTGACAAGATCAAGCTGAAGTTCGACAAGTACCAACTATTAAACGGCTGG  
GACAAGGACAAGGAGAGAGAATACGGAGCGGTGTGCTGTGTAAGGACGAGAAGTACTACCTGGCCATCATTGACAAGTCTA  
ACAACCGCATCTTGAGAACATCGACTTCCAAGACTGTGACGAGTCTGACTGTTACGAGAAGATTATCTACAAGTCTGCTCCG  
ACTCCGAACAAGATGCTGCCGAAGGTGTTTTTCGCCAAGAAGCATAAGAAGCTGTTGAGCCCAAGCGACGAGATTCTGAAGA  
TCTACAAGTCTGGCACTTTTAAGAAGGGCGACAAGTTTTCTCTGGACGACTGTCATAAGTTAATCGACTTTTACAAGGAGAGCT  
TTAAGAAGTACCCGAAGTGGTTAATCTACAACCTCAAGTTAAGAAGACCAACGAGTACAACGACATCCGTGAGTTCTACAAC  
GACGTGGCTTTACAAGGTTACAACATCAGCAAGATGAAGATCCCGACCTCTTTCATCGACAAGCTGGTCGACGAGGGAAAGAT  
CTACCTGTTTCAACTTTACAACAAGGACTTCAGCCACATTCTAAGGGCACTCCGAAGTTACATACCTGTACTTCAAGATGTTA  
TTCGACGAGAGAAACCTGGAGGACGTGTTTACCGTCTGAACGGCGAAGCCGAGATGTTCTACCGCCCGCCAGTATTAAGTA  
CGACAAGCCGACTCATCCGAAGAACACCCCAATTAAGAACAAGAACACCCCTTAACGACAAGAAGGCCTCTACTTTCCCGTAC  
GACTTAATCAAGGACAAGCGTTACACTAAGTGGAATTCAGCCTGCATTTCCGATCACTATGAAGTTCGAGGCTCCAGACCGT  
GCCATGATTAACGACGACGTAAGAACTTATTAAAGTCGTGTAACAACAACCTTTATCATTGGAATCGACAGAGGCGAGAGAAA  
CTTGCTGTACGTATCTGTATCGACTCTAACGGCGCTATTATTTACCAACATAGCCTTAACATCATCGGAAACAAGTTCAAGGGA  
AAGACCTACGAGACTAACTACCAAGAGAAGCTGGCCACCAGAGAGAAGGAACGCACGAGCAACGTCGCAACTGGAAGGCC  
ATCGAAAAGTATTAAGGAGCTTAAGGAAGGCTACATCAGTCAAGCTGTTTCATGTGATTTGTCAACTGGTGGTAAAGTACGACGC  
CATCATCGTGATGGAGAAGTTAACTGACGGATTTAAGCGTGGCAGAACCAAGTTTCGAGAAGCAAGTGTACCAAAAGTTCGAG  
AAGATGTTAATCGACAAGCTGAAGTACTACGTGGACAAGAAGCTGGACCCGGACGAGGAGGGCGGCTTACTGCATGCATACC  
AACTGACGAACAAGCTGGAATCTTTCGACAAGCTGGGCACGCAATCTGGCTTCATCTTTACGTGCGCCCGGACTTCACCTCT  
AAGATCGACCCGGTGACTGGCTTCGTCAACTTGTTGTACCCGCGTTACGAGAACATCGACAAGGCAAAGGACATGATCAGCA  
GATTCGACGACATTAGATACAACGCAGGCGAAGACTTCTCGAGTTCGACATCGACTACGACAAGTTCCCGAAGACTGCGAGT  
GACTACCGTAAGAAGTGGACCATCTGTACTAACGGCGAGCGTATCGAGGCTTTTAGAAACCCGGCCAACAACAACGAGTGGA  
GTTACCGCACCATTTATCTGGCCGAGAAGTTTAAAGGAGTTATTCGACAACAACAGTATTAAGTACCGCGACAGTGACGACTTGA  
AGGCTGAGATCCTGAGCCAAACCAAGGGCAAGTTCTCGAAGACTTTTTTAAGTTATTAAGACTGACTCTACAAATGCGTAAC  
AGTAACCCGGAGACCCGGCGAAGACCGCATCCTGAGTCCGGTAAAGGACAAGAACGGAAGTCTTACGACAGTAGCAAGTAC  
GACGAGAAGTCTAAGCTGCCATGTGACGCAGACGCCAACGGCGCGTACAACATCGCACGTAAGGGCTTGTGGATCGTGAGC  
AATTTAAGAAGTCGGAACAAGTGAGCACTGTAGAGCCAGTCATCCATAACGACAAGTGGTTAAAGTTCGTGCAAGAAAACGA  
CATGGCGAACAAC AAGCGGCCTGCGGCTACTAAGAAGGCTGGGCAGGCTAAGAAGAAGAAG
